# Supplementary material
Source: Springer Nature journal article supplement (https://www.springermedizin.de/resource/supplementary/13033_2013_174_MOESM1_ESM.pdf/9651992)

**child**

**mother**

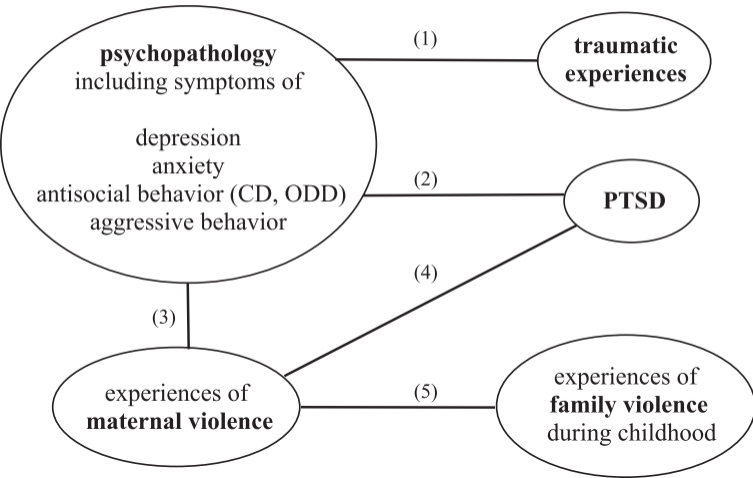

Supplement: MOESM1 [file 9651992]
